# Supplementary material
Source: PubMed Central journal article supplement (PMC4356241)
Supplement: Supp_Fig1.pdf [file Supp_Fig1.pdf]

## Supplementary Data

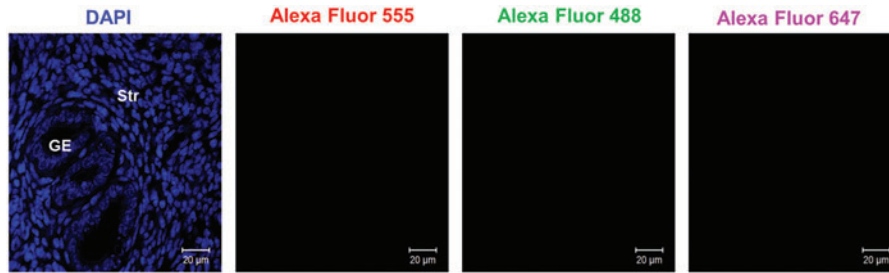

**SUPPLEMENTARY FIG. S1.** Negative controls for secondary antibodies. Images showing the negative control of Alexa Fluor 555 (*red*), 488 (*green*), and 647 (*far red*). Scale bar: 20 µm.
