# Supplementary material
Source: PubMed Central journal article supplement (PMC4356241)
Supplement: Supp_Fig2.pdf [file Supp_Fig2.pdf]

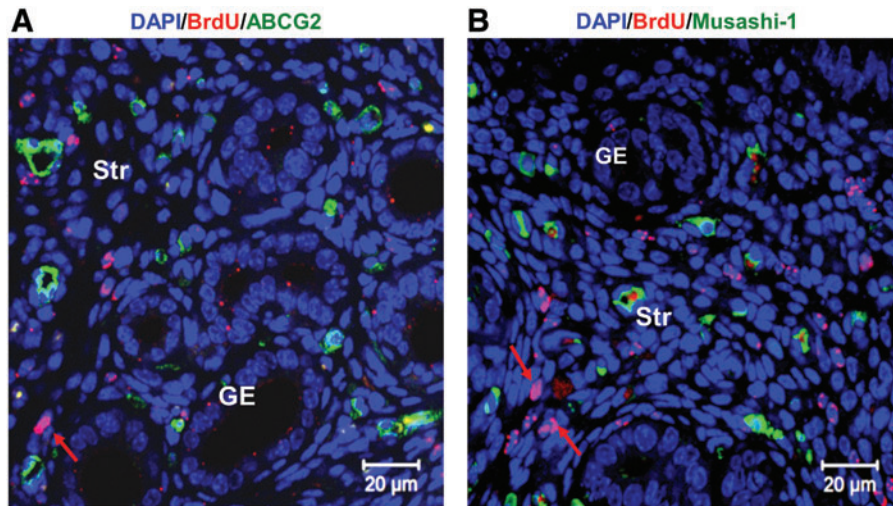

**SUPPLEMENTARY FIG. S2.** LRSC did not express ABCG2 and Musashi-1. Immunofluorescence images showing the LRSC did not coexpress (*red arrow*) (A), the hematopoietic stem cell marker ABCG2, and (B) potential human endometrial stem cell marker Musashi-1. BrdU, bromodeoxyuridine; LRSC, label-retaining stromal cells; GE, glandular epithelium; Str, stroma. Scale bar: 20 µm.
