# Supplementary material
Source: PubMed Central journal article supplement (PMC4356241)
Supplement: Supp_Fig3.pdf [file Supp_Fig3.pdf]

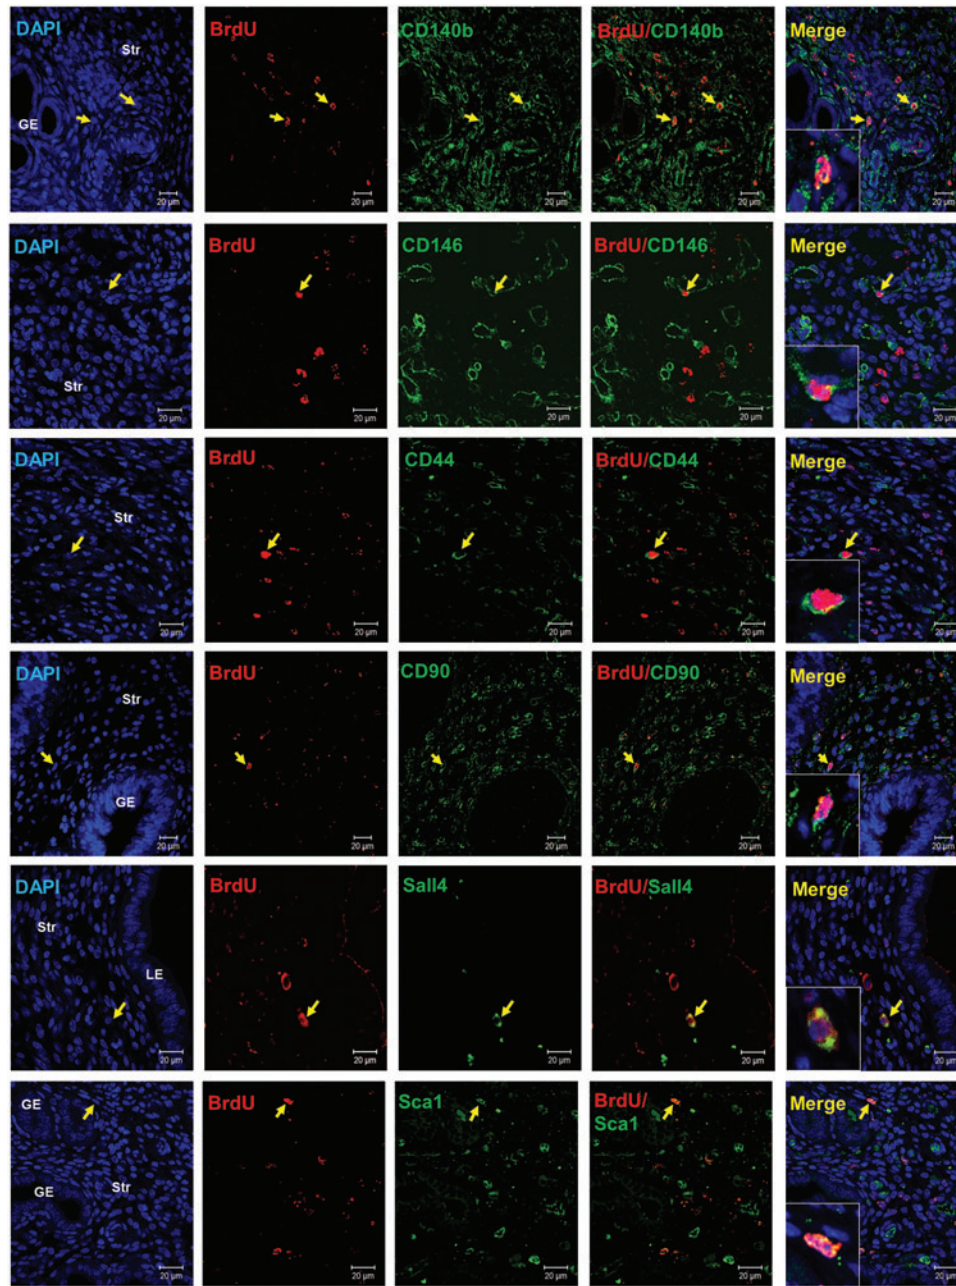

**SUPPLEMENTARY FIG. S3.** Phenotypic characterization of LRSC with various surface markers. Representative immunofluorescence images showing the single panels and merged figures of LRSC coexpressing (*yellow arrow*) CD140b, CD146, CD44, CD90, Sall4, and Sca1. LE, luminal epithelium. Scale bar: 20  $\mu\text{m}$ .
