# Supplementary material
Source: PubMed Central journal article supplement (PMC4356241)
Supplement: Supp_Tables1-2.pdf [file Supp_Tables1-2.pdf]

**Cao et al., Supplementary Tables**

**Table S1. List of Primary Antibodies**

| Antibody                | Source      | Clone (if applicable) | Catalog Number | Concentration | Species |
|-------------------------|-------------|-----------------------|----------------|---------------|---------|
| ABCG2                   | Abcam       |                       | ab24115        | 1:400         | Rat     |
| Active $\beta$ -catenin | Millipore   |                       | 05-665         | 1:100         | Mouse   |
| $\beta$ -catenin        | BD          |                       | 610153         | 1:300         | Mouse   |
| BrdU                    | Abcam       |                       | ab1893         | 1:800         | Sheep   |
| CD29                    | Abcam       | EP1041Y               | ab52971        | 1:400         | Rabbit  |
| CD44                    | Abcam       | KM201                 | ab25340        | 1:200         | Rat     |
| CD45                    | Abcam       |                       | ab10558        | 1:500         | Rabbit  |
| CD90                    | Abcam       | IBL-6/23              | ab3105         | 1:200         | Rat     |
| CD146                   | Abcam       |                       | ab75769        | 1:800         | Rabbit  |
| Connexin 43             | Millipore   |                       | ab1728         | 1:200         | Rabbit  |
| Ki67                    | Abcam       | SP6                   | ab16667        | 1:800         | Rabbit  |
| Lim1                    | Millipore   |                       | AB3200         | 1:200         | Rabbit  |
| Musashi                 | R&D Systems | 282613                | MAB2628        | 1:200         | Mouse   |
| PDGFR $\beta$           | Abcam       | 18A2                  | ab99896        | 1:200         | mouse   |
| Sall-4                  | Abcam       |                       | ab29112        | 1:200         | Rabbit  |
| Sca-1                   | Abcam       | E13 161-7             | ab51317        | 1:50          | Rat     |
| Cytokeratin             | Abcam       |                       | ab9377         | 1:50          | Rabbit  |

**Table S2. List of Secondary Antibodies**

| Antibody           | Conjugation | Source            | Catalog Number | Concentration |
|--------------------|-------------|-------------------|----------------|---------------|
| Donkey anti-sheep  | Biotin      | Abcam             | ab6899         | 1:800         |
| Donkey anti-sheep  | Alexa 555   | Life technologies | A21436         | 1:800         |
| Goat anti-rabbit   | Alexa 488   | Life technologies | A21069         | 1:400         |
| Rabbit anti-mouse  | Alexa 488   | Life technologies | A11059         | 1:400         |
| Goat anti-rat      | Alexa 488   | Life technologies | A11006         | 1:200         |
| Donkey anti-rabbit | Alexa 647   | Life technologies | A31573         | 1:600         |
